# Supplementary material
Source: Springer Nature journal article supplement (https://www.springermedizin.de/resource/supplementary/12885_2012_3655_MOESM1_ESM.pdf/9465964)
Supplement: MOESM1 [file 9465964]

**Inclusion****Measure 1**

**Baseline:** IES, HADS, SF36, FQ, EQ-5D, VS-20, Objectively measured physical activity, Medical and demographic background data

n = 300

Randomization

**Intervention group (I): Stress management**

**Step 1:** 1 session

n = 150

**Control group (C)**

n = 150

**Measure 2**

**6 weeks:** IES, HADS; VS-20

Screening for stress-related symptoms (IES, HADS )

**Intervention group (I-a)**  
**Step 2**

**I-a:** non-cases receive  
1 final session  
Estimated N = 75

**Intervention group (I-b)**  
**Step 2**

**I-b:** cases receive 4-7  
sessions  
Estimated N = 75

**Control group (C)**

**C-a:** non-cases according to IES,HADS  
Estimated N = 75  
**C-b:** cases according to IES, HADS  
Estimated N = 75

**Measure 3**

**4 months:** IES, HADS, FQ, EQ-5D, VS-20, CSQ-8, patient satisfaction (only for Intervention focus I-a and I-b), Medical and demographic background data

n = 300

**Measure 4**

**8 months:** IES, HAD, FQ, EQ-5D, VS-20, Objectively measured physical activity, Medical and demographic background data

n = 300

**Measure 5**

**12 months:** IES, HADS, SF36, FQ, EQ-5D, VS-20, Medical and demographic background data

n = 300

**Measure 6**

**24 months:** IES, HADS, SF36, FQ, EQ-5D, VS-20, CSQ-8, Objectively measured physical activity, Medical and demographic background data

n = 300
